# Supplementary material
Source: Research Square preprint supplement (doi:10.21203/rs.3.rs-9916752/v1)
Supplement: Supplementary file 1 [file 7510818bf41bea1bf68a89a3.docx]

**Supplementary Information**

# **Empirical MEG Dataset Processing**

In this study, we used a publicly available magnetoencephalography (MEG) dataset collected by Armeni et al. (2022), which includes approximately 10 hours of English audiobook-listening data per participant. MEG data were recorded using a 275-channel axial gradiometer CTF system, and participants wore individualized head casts to minimize head movement during recording. The signals were digitized at a sampling rate of 1200 Hz. A high-resolution T1-weighted MRI scan was acquired for each participant and used for MEG-MRI co-registration. The data repository also included eye-tracking recordings acquired with an EyeLink 1000 eye tracker (SR Research) at a sampling rate of 1000 Hz, although these data were not used in the present study.

The audiobook stimulus text was tokenized using the Spacy natural language processing library and the Carnegie Mellon University LOGIOS Lexicon Tool. Word and phoneme timing information was determined using the Penn Forced Aligner toolkit with pretrained acoustic models for English for automatic forced alignment of the audio recordings and the text obtained from Project Gutenberg. Using the provided timing files, we segmented the text into shorter sentences and obtained onset and offset times for each sentence. Long sentences were segmented into shorter sentences, ensuring that each sentence contains a complete linguistic clause, and words were checked for standard American English spelling before training and testing.

The empirical MEG dataset included MATLAB data structures containing information for pre-processing, such as channel selection, trial definition, superconducting quantum interface device (SQUID) and muscle artifact definitions, and the audio delay between audio recording onset and the MEG trigger sending, among other files not used in this study. We applied a notch filter (49-51, 99-101, and 149-151 Hz) to remove line noise artifacts and then a band-pass filter (1- 60 Hz). Rather than removing artifacts related to muscle contractions and SQUID jumps from the data during preprocessing, we identified the indices where artifacts occurred in the data, converted these indices to time values, and used those time values after preprocessing the data to exclude whole sentences from the dataset where artifacts occurred.

After artifact identification, Hilbert transforms were applied to extract signal amplitude in five canonical frequency bands: theta (4–8 Hz), alpha (8–13 Hz), low beta (13–20 Hz), high beta (20–30 Hz), and low gamma (30–50 Hz). Finally, the data were downsampled to 120 Hz. For additional details on the MEG dataset, please refer to the original publication by Armeni et al. (2022).

# **Empirical MEA Data Processing Details**

In this study, we used a publicly available intracortical microelectrode array (MEA) dataset collected by Willett et al. (2023) from one subject. The empirical MEA signals were analog filtered, digitized at 30 kHz, and underwent digital filtering and feature extraction. Digital filtering consisted of a high-pass filter (300 Hz cutoff) applied non-causally to each electrode with a 4 ms delay, followed by linear regression referencing (LRR) to reduce ambient noise artifacts. Binned threshold crossing counts (20 ms bins) were then found by counting how many times the filtered voltage time series crosses an amplitude threshold of -4.5 times the standard deviation of the voltage signal. Electrode-specific thresholds and LRR filter coefficients were set using data from the diagnostic block at the beginning of each session. Binned spike band power (20 ms bins) was generated by taking the sum of squared voltages occurring during each time bin. For more detailed information on the MEA dataset, please refer to the original publication by Willett et al. (2023).

# **Detailed Description of our Decoding Framework**

First, the MEG input features underwent Softsign nonlinearity activation to normalize the signal range. The temporal signals were then processed through a moving window operation (implemented via an unfolding layer) that extracted overlapping temporal segments. Specifically, a sliding window with a kernel length of 32 time points (266.7 ms at 120 Hz) moved across the time dimension with a stride of 4 time points (33.3 ms), resulting in consecutive windows that overlapped by 28 time points. This operation transformed each temporal window into a flattened feature vector by concatenating all 269 MEG channels across the 32 time points, yielding 8,608-dimensional input features (269 channels × 32 time points) for each window. This temporal windowing approach allowed the model to capture local temporal dynamics while maintaining computational efficiency through the strided sampling. Gaussian smoothing with a width of 5.0 time points was applied to reduce high-frequency noise in the MEG signals.

The preprocessed windowed features were projected through a linear layer (269 channels → 269 dimensions per time point, maintaining the 8,608-dimensional representation). The core decoder consisted of a 2-layer bidirectional gated recurrent unit (GRU) model with 1,024 hidden units per direction. The bidirectional architecture processed each sequence both forward and backward in time, capturing temporal dependencies in both directions, with the outputs concatenated to form 2,048-dimensional representations. Dropout regularization (p = 0.2) was applied between GRU layers to prevent overfitting. Finally, a fully connected output layer mapped the bidirectional GRU representations to 41 classes, comprising 40 phoneme categories (39 ARPABet English phonemes and a “silence” phoneme) plus one blank class (class 0) used for connectionist temporal classification (CTC) decoding.

The network was optimized using CTC loss (Graves et al., 2006), which enabled alignment-free training by marginalizing over all possible alignments between the input MEG sequences and target phoneme sequences. The CTC framework introduced a blank token to account for non-phonemic segments and repetitions, allowing the model to output variable-length phoneme sequences without requiring frame-by-frame phoneme annotations. During the forward pass, CTC computed the sum of probabilities across all valid alignment paths between the predicted output distribution and the ground truth phoneme sequence. The negative log-likelihood of this marginalized probability was minimized during training, enabling the network to learn temporal alignments implicitly while decoding phoneme sequences.

Our GRU model was trained for 30,000 iterations with a batch size of 128 using the Adam optimizer (Kingma & Ba, 2014), an adaptive learning rate method that computes individual parameter updates based on estimates of first and second moments of the gradients, with a constant learning rate of 0.01 and a L2 weight decay of 1×10-5. Data augmentation included additive white noise (SD = 0.4) and constant offset variations (SD = 0.2) to improve model robustness and generalization. All computations were performed on CUDA-enabled GPUs using PyTorch, with a fixed random seed for reproducibility. Additionally, for all experiments, we employed k-fold cross-validation (k = 8) on the training set to train the GRU phoneme decoder and optimize hyperparameters. During each fold, 80% of the training data was used for model parameter updates while 20% served as a validation set for hyperparameter tuning and early stopping. Hyperparameters optimized during this process included the number of GRU hidden units, dropout rate, learning rate, and regularization strength. We selected the hyperparameter configuration that achieved the best average validation performance across all folds. For each new set of hyperparameters, we ran the model five times and took the average performance across these runs. All GRU hyperparameters and corresponding range for tuning are shown in **Supplementary Section 7**.
 To translate phoneme sequences into English sentences, we implemented a multi-stage decoding pipeline incorporating both n-gram and neural language models. We adopted the 5-gram language model (LM) architecture developed by Willett et al. (2023), which was trained on the OpenWebText2 corpus containing Reddit submissions from 2005 to April 2020. The language model was constructed by randomly sampling 95% of the corpus for training, preprocessed to retain only English letters and four punctuation marks (period, comma, apostrophe, and question mark), yielding 634 million sentences with 99 billion words. N-gram frequencies (unigram through 5-gram) were computed using SRILM (Stolcke, 2002) with Good-Turing discounting to improve probability estimates for rare word combinations. The resulting 5-gram LM was represented as a weighted finite-state transducer (WFST) (Mohri et al., 2002), which efficiently maps CTC label sequences to candidate word sequences through the composition of three transducers: *T* (token-to-phoneme mapping including the CTC blank symbol), *L* (lexicon encoding phoneme-to-word mappings from the Carnegie Mellon University Pronunciation Dictionary with a silence phoneme appended to each word at probability 0.9), and *G* (grammar encoding n-gram word transition probabilities). To maximize LM performance, we performed a grid search over two critical hyperparameters: the acoustic scale, which controls the relative weight of the phoneme-predicting model versus the language model (ranging from 0 to 1, where higher values increase reliance on neural predictions), and the GPT-2 re-scoring weight, which determines the contribution of the neural language model to the final decoding score. These hyperparameters were optimized on the validation set to balance phonological evidence from MEG signals with linguistic constraints from the language models.

To further improve decoding accuracy, we employed GPT-2 (Radford et al., 2019) for neural language model re-scoring. Following the n-gram decoding, GPT-2 was used to re-score the top candidate sentences by computing their log-probabilities under the pretrained model. Unlike n-gram models which capture limited context (5 words), GPT-2’s transformer architecture can model substantially longer contextual dependencies (up to 1024 tokens), enabling more accurate disambiguation of acoustically similar word sequences. The final decoded sentence was selected as the candidate with the highest combined score from both the n-gram WFST decoder and GPT-2 re-scoring, weighted by empirically tuned interpolation parameters.

# **Performance Metrics**

We used the following performance metrics to quantify the performance of our decoding framework at different points in the pipeline, from phoneme probabilities to word/sentence-level outputs:

- **Phoneme Error Rate (PER):** calculated as the edit distance (sum of substitutions, insertions, and deletions) between the predicted and ground truth phoneme sequences, normalized by the length of the ground truth sequence. PER directly assesses the acoustic-to-phonetic decoding accuracy of the GRU model before language model integration.
- **Character Error Rate (CER):** calculated as the normalized edit distance at the character level, providing a fine-grained assessment of orthographic accuracy that is particularly sensitive to partial word errors.
- **Word Error Rate (WER):** calculated as the normalized edit distance at the word level, reflecting the functional intelligibility of the decoded output for practical communication applications.
- **BERTScore:** calculates token-level cosine similarity, making it effective at understanding context, rather than prioritizing exact word matches. We used this metric to evaluate the semantic similarity between the predicted and ground truth transcripts.

# **Simulated MEG Data Generation**

First, we performed temporal alignment between the MEG signals and their corresponding phoneme sequences using the ground truth transcripts and phoneme onset times. This alignment allowed us to segment the continuous MEG recordings into discrete epochs, each corresponding to a single phoneme utterance. For each of the 40 phoneme categories (39 ARPABet English phonemes and a “silence” phoneme), we collected all sessions from the entire Subject 1 dataset, resulting in variable numbers of exemplars per phoneme (ranging from dozens to thousands of instances depending on phoneme frequency in the speech corpus).

To identify a representative template for each phoneme, we analyzed the distribution of phoneme durations within each category. Phoneme durations varied considerably even within the same phoneme category due to prosodic factors, speaking rate, and phonetic context. For each phoneme, we identified the most frequently occurring duration (modal duration) by binning durations into 1/120s intervals (same as sampling rate) and selecting the bin with the highest count. We then selected only those exemplar epochs matching this modal duration, ensuring temporal consistency for the subsequent dimensionality reduction step. This duration-matching step was critical because principal component analysis (PCA) requires input vectors of identical dimensionality.

We then applied PCA to the duration-matched exemplars for each phoneme category. Specifically, for a phoneme with *N* exemplars across 269 MEG channels and *T* time points (corresponding to the modal duration at 120 Hz sampling rate), we constructed a data matrix of size *N* × (269 × *T*), where each row represents a flattened spatiotemporal MEG pattern for one phoneme instance. PCA was performed on this matrix to identify the principal axes of variation across exemplars. We retained only the first principal component (PC1), which captures the dominant spatiotemporal pattern shared across all exemplars of that phoneme while averaging out instance-specific noise and variability. This PC1 vector was then reshaped back into a 269-channel × *T*-timepoint template, representing the characteristic neural response pattern for that phoneme category. **Fig. 3B** shows example templates extracted for phonemes /G/, /AH/, /AA/, /EY/, and /HH/, illustrating the distinct spatiotemporal MEG patterns associated with different phoneme categories.

Finally, to generate continuous synthetic MEG signals for arbitrary phoneme sequences, we concatenated the appropriate phoneme templates according to the target sequence. Since phonemes in natural speech vary in duration, we temporally stretched or compressed each template to match the ground truth duration for that phoneme instance using cubic spline interpolation. This interpolation method preserves the overall temporal structure of the neural response while smoothly adjusting its duration. This process was repeated across all 269 channels simultaneously to maintain the spatial correlation structure of the MEG signals. By concatenating duration-adjusted templates for each phoneme in a sequence, we generated full-length synthetic MEG recordings that retained the essential phoneme-specific neural patterns observed in real data while allowing precise control over signal properties for subsequent validation experiments.

# **Uniformly Distributed Phoneme Durations Experiment**

We investigated how the phoneme duration variability in uniform distribution affects decoding performance by generating additional simulated datasets where phoneme durations were sampled from *l* ∼ U(30,lavg+∆) ms, where lavg is the average phoneme duration and the upper bound offset ∆ takes values of 300, 500, 750, 1,000, 1,750, and 4,500 ms. This parametric sweep created duration distributions with progressively increasing variability, ranging from narrow ranges similar to controlled laboratory speech (∆= 100) to extreme variability far exceeding natural speech patterns (∆= 4,500). By training models on each duration range condition and evaluating their phoneme error rates, we were able to characterize how decoding performance degrades as a function of temporal uncertainty, giving insight into the practical limits of duration variability that recurrent decoders can accommodate and informing whether future systems require explicit duration normalization or can handle the natural temporal variability present in spontaneous speech.

In our investigation of PER as a function of noise level for fixed phoneme durations, the model maintained robust performance when duration variability follows a uniform distribution with different upper bounds (lavg+∆) and a fixed lower bound (30 ms) (**Fig. S1**).


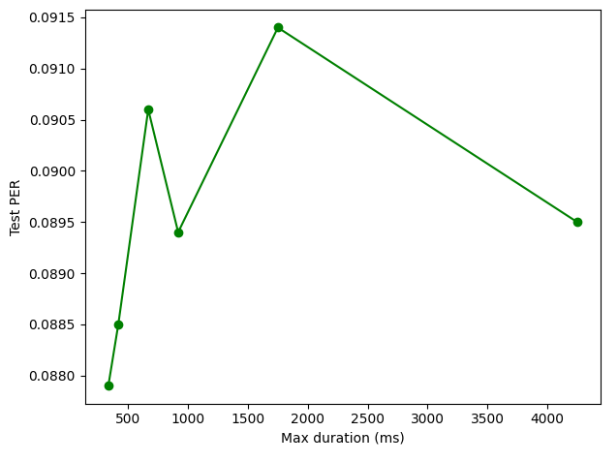


**Fig. S1.** Effect of uniformly distributed phoneme durations on PER. Phoneme durations were sampled from a uniform distribution with a fixed lower bound of 30 ms and progressively increasing upper bounds. PER is shown as a function of the maximum phoneme duration, illustrating how decoding performance changes with increasing duration variability.

# **Other Validation Experiments**

# **Phoneme frequency distribution**

In natural language, phoneme frequencies are highly imbalanced, as common phonemes occur far more frequently than rare phonemes. This imbalance can bias model learning toward frequent phonemes, potentially degrading performance on rare categories. To investigate whether balanced phoneme representation improves decoding accuracy, we generated simulated datasets with equal occurrence of all 40 phoneme categories by creating random phoneme sequences where each phoneme appears with uniform probability, rather than using the naturalistic phoneme sequences from real sentences. We trained separate GRU models on balanced versus imbalanced phoneme distributions and compared their phoneme error rates across all phoneme categories. Under the balanced condition, the model achieved a PER of 57.3% for short sentences and 59.2% for all sentences.

# **Sentence length**

Sentence length varies substantially in natural speech, yet most studies do not evaluate how utterance duration affects decoding performance. Non-invasive studies typically use continuous narrative stimuli with variable sentence lengths (d'Ascoli et al., 2025; Gwilliams et al., 2023; Nastase et al., 2021), while invasive BCI studies often employ more uniform single-sentence prompts (Littlejohn et al., 2025; Silva et al., 2024; Willett et al., 2023). When comparing accuracies across studies or modalities, understanding how sentence length distributions influence performance is critical, particularly when training sets have imbalanced numbers of samples at each duration. To quantify this effect, we compared decoding performance when training on the full empirical MEG dataset (all sentence lengths) versus training on length-stratified subsets where only sentences within specific phoneme length bins were included. We manually control the number of phonemes in each sentence as 10, 20, 30, 40, 50, and 100. **Fig. S2A** shows the corresponding PER. Within these values, we believe the number of phonemes does not contribute much to the quality of phoneme decoding.

# **Number of sentences**

Insufficient training data can limit model generalization, particularly in noisy conditions where the model must learn robust phoneme representations. To investigate whether synthetic data augmentation can improve decoding accuracy, we generated additional training samples by creating random phoneme sequences with simulated MEG signals at low signal-to-noise ratios (SNRs), matching the noise characteristics of degraded empirical recordings. We then trained GRU models on datasets combining real and synthetic samples, comparing performance against baseline models trained only on real data to determine whether augmentation reduces phoneme error rates. We set the SNR to -13.4 dB and added random sentences to the simulation dataset containing 20,000, 50,000, and 100,000 sentences. In **Fig. S2B**, the PER slightly decreased as the number of distinct sentences increases.

(A) (B)


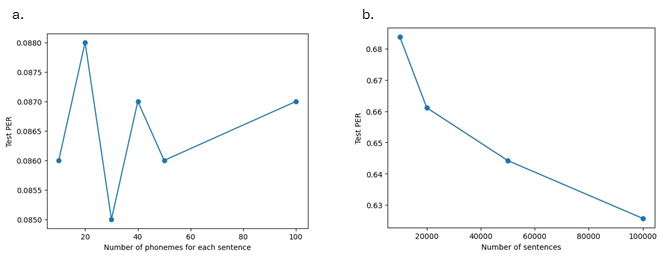

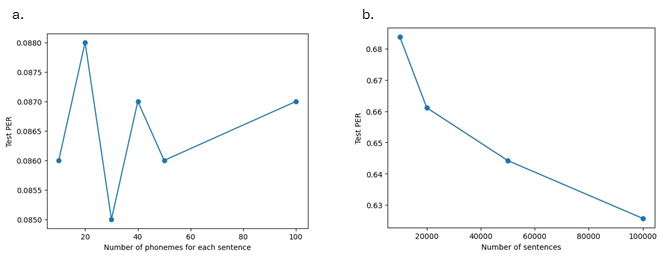


**Fig. S2.** Effects of sentence length and training dataset size on phoneme error rate. **(A)** Relationship between PER and the number of phonemes per sentence, illustrating how decoding performance varies with sentence length. **(B)** Relationship between PER and the number of training sentences in the simulated MEG dataset. Additional synthetic sentence-level samples were generated at an SNR of −13.4 dB and added to the training set at dataset sizes of 20,000, 50,000, and 100,000 sentences. The leftmost point represents the baseline condition using the original dataset without additional synthetic sentences (6,412 sentences). PER decreased slightly as the number of distinct training sentences increased.

# **Phoneme stress**

The original empirical MEG dataset provided phoneme transcriptions using a 69-phoneme dictionary, where each vowel phoneme can have up to three sub-categories based on the stress of that phoneme (0 = no stress, 1 = primary stress, 2 = secondary stress). In our primary analyses, we used a reduced 40-phoneme set by removing stress markers and collapsing stressed and unstressed variants of the same phoneme. For example, /AH0/, /AH1/, and /AH2/ were combined as /AH/. Since stress distinctions may carry linguistic information and may be reflected in neural signals through duration, amplitude, or prosodic modulation, we evaluated whether preserving stress markers improved decoding performance. We trained additional models using the full 69-phoneme set with stress markers retained and compared their PER values with those from the stress-collapsed 40-phoneme models across both subjects and sentence-length conditions. As shown in **Table S1**, decoding performance was consistently better when stress markers were removed. This may reflect the similarity of neural representations across stressed and unstressed variants of the same vowel, as well as increased class imbalance when the phoneme set is expanded from 40 to 69 categories within the same dataset. These factors may limit the GRU model’s ability to learn robust and distinct representations for stress-specific vowel subclasses.

**Table S1.** Effect of phoneme stress markers on MEG decoding performance. Decoding performance was compared using phoneme sets with stress markers retained, resulting in 69 phoneme classes, and with stress markers removed, resulting in 40 phoneme classes. Models were evaluated using both the full sentence set and the short-sentence subset. PER, phoneme error rate.

| **Subject** | **Sentence Count** | **Stress** | **PER (%)** |
| --- | --- | --- | --- |
| 1 | 6412 | Yes | 75.2 |
| No | 67.4 |
| 3045 | Yes | 69.3 |
| No | 62.2 |
| 2 | 6412 | Yes | 76.9 |
| No | 70.1 |
| 3045 | Yes | 74.4 |
| No | 68.0 |

# **Cross-subject generalization**

A critical practical consideration for neural speech decoding systems is whether models trained on one individual can generalize to decode neural signals from different users, which would enable transfer learning and reduce the need for extensive subject-specific training data. Individual differences in brain anatomy, functional organization, and neural response properties may limit cross-subject transferability. To evaluate generalization across individuals, we trained GRU models on the complete dataset from Subject 1 and tested them on held-out data from Subject 2 and conversely trained on Subject 2 and tested on Subject 1. This cross-subject evaluation was performed across all frequency bands, with PERs compared against within-subject performance (where training and testing used different data from the same subject) to quantify the performance cost of cross-subject transfer. **Table S2** presents the PER of the test set from Subject 2 using the model trained on Subject 1, as well as the PER of the test set from Subject 1 using the model trained on Subject 2. Both PER values showed a substantial degradation compared to the models trained and tested on the corresponding subjects. Moreover, the PER obtained when switching test sets was not stable, exhibiting a variation of approximately 5% between the maximum and minimum values across five trials.

The substantial inter-individual variability in decoding performance, with Subject 1 consistently outperforming Subject 2, supports the notion of individual differences in the strength and consistency of speech-evoked MEG responses due to differences in cortical anatomy, skull conductivity, sensor-to-source distance, attention and engagement during the recording session, and potentially individual differences in speech processing strategies (Duraisamy et al., 2025; Gijbels et al., 2025). This variability underscores the importance of subject-specific decoder training and calibration for practical BCI applications.

**Table S2.** Cross-subject MEG decoding performance. Models were trained on one subject and tested on the other using the full sentence set. The sentence stimuli and timing annotations were matched across subjects, enabling direct cross-subject evaluation.

| **Train Subject** | **Test Subject** | **Test PER** |
| --- | --- | --- |
| 1 | 2 | 0.812 ± 0.05 |
| 2 | 1 | 0.827 ± 0.06 |

# **Baseline window selection**

In MEG and EEG preprocessing, baseline correction is commonly used in event-related analyses to reduce sensor-specific offsets and slow drifts by referencing each trial to a pre-event time window. Baseline-window selection is particularly important for continuous speech paradigms. Short baseline windows may provide an unstable estimate of background activity, whereas longer windows may overlap with neural responses to preceding phonemes, words, or sentence context. Similarly, baseline windows placed immediately before phoneme onset may contain coarticulatory, anticipatory, or ongoing speech-related activity, while earlier windows may reduce this risk but also exclude more trials because of insufficient clean pre-event data. Thus, the baseline interval must balance temporal proximity to the event, stability of the reference estimate, and preservation of sufficient training data.

To evaluate the effect of baseline-window selection on decoding performance, we tested four pre-phoneme baseline windows relative to phoneme onset: −0.1 to 0 s, −0.5 to −0.1 s, −1.0 to −0.5 s, and −0.3 to 0 s. Baseline correction was applied to the empirical MEG data by computing the mean signal amplitude within each baseline window for each channel independently and subtracting this value from the corresponding trial time course. All experiments were performed using low-beta-band features, which yielded the strongest decoding performance in the main analyses. Separate GRU models were trained for each baseline condition, and PER was compared across subjects and sentence-length conditions.

**Table S3** shows PER values across baseline-window conditions for both subjects using the full sentence dataset and the short-sentence subset. Overall, baseline-window selection had a modest effect on decoding performance. The −0.5 to −0.1 s window produced the best or near-best PER across subjects and sentence-length conditions, suggesting that this interval provided a useful balance between avoiding the immediate pre-phoneme period and retaining sufficient training data. However, because the number of usable sentences differed across baseline conditions, these results should be interpreted as a practical optimization analysis rather than a direct comparison of baseline windows using identical datasets. The −0.1 to 0 s and −0.3 to 0 s windows showed slightly worse performance in some conditions, possibly because they included activity immediately preceding phoneme onset. The −1.0 to −0.5 s window also performed comparably in some cases but retained substantially fewer usable sentences, limiting its practical utility for model training.

**Table S3.** Effect of baseline-window selection on MEG phoneme decoding performance. PER was compared across four pre-phoneme baseline windows using low-beta-band MEG features. Analyses were performed separately for each subject using the full sentence dataset and the short-sentence subset. “Short Sentences Only” indicates whether only short sentences were used for training and testing. “Sentence Count” denotes the number of usable sentences retained for each baseline-window condition.

| **Subject** | **Short Sentences Only** | **Sentence Count** | **Baseline Window (s)** | **PER (%)** |
| --- | --- | --- | --- | --- |
| 1 | No | 9127 | (-0.1, 0) | 68.4 |
| 6412 | (-0.5, -0.1) | 67.4 |
| 2298 | (-1.0, -0.5) | 68.1 |
| 7944 | (-0.3, 0) | 67.6 |
| Yes | 4497 | (-0.1, 0) | 62.5 |
| 3045 | (-0.5, -0.1) | 62.2 |
| 983 | (-1.0, -0.5) | 62.8 |
| 3771 | (-0.3, 0) | 62.4 |
| 2 | No | 9154 | (-0.1, 0) | 71.9 |
| 6682 | (-0.5, -0.1) | 70.1 |
| 2536 | (-1.0, -0.5) | 71.0 |
| 8011 | (-0.3, 0) | 70.4 |
| Yes | 4601 | (-0.1, 0) | 68.3 |
| 3083 | (-0.5, -0.1) | 68.0 |
| 1039 | (-1.0, -0.5) | 68.0 |
| 3991 | (-0.3, 0) | 68.2 |

# **Table of all GRU hyperparameters**

All GRU hyperparameters considered during model training and tuning are summarized in **Table S4**.

**Table S4.** Summary of hyperparameters used for the GRU-based neural sequence decoder. The table lists the default configuration, tuning ranges or candidate values, and the function of each hyperparameter.

| **Hyperparameter** | **Default Value** | **Tuning Range** | **Function** |
| --- | --- | --- | --- |
| nClasses | 40 | {40, 69} | Defines the number of phoneme classes used in an experiment. |
| nInputFeatures | 269 | {68, 133, 269, 1345} | Defines the shape of input features used in an experiment. |
| nBatch | 30000 | [10000, 50000] | Controls the number of gradient updates. |
| batchSize | 128 | {16, 32, 64, 128, 256} | Controls the number of samples per gradient update. |
| lrStart | 0.01 | [1e-4, 1e-1] | Defines the learning rate schedule. |
| lrEnd | 0.01 | [1e-5, 1e-2] | Defines the learning rate schedule. |
| nUnits | 1024 | {128, 256, 512, 1024, 2048} | Determines the model capacity. |
| nLayers | 2 | {1, 2, 3, 4, 5} | Determines the model capacity. |
| dropout | 0.4 | [0.1, 0.6] | Regulates regularization strength. |
| whiteNoiseSD | 0.4 | [0.0, 0.6] | Defines input augmentation parameters. |
| constantOffsetSD | 0.2 | [0.0, 0.5] | Defines input augmentation parameters. |
| gaussianSmoothWidth | 5.0 | [0.0, 10.0] | Defines input augmentation parameters. |
| strideLen | 4 | {1, 2, 4, 8} | Convolutional front-end settings. |
| kernelLen | 32 | {8, 16, 32, 64} | Convolutional front-end settings. |
| bidirectional | True | {True, False} | Specifies whether GRU layers process input in both temporal directions. |
| L2_decay | 1e-5 | [1e-7, 1e-3] | Applies weight regularization. |

# **References**

Armeni, K., Güçlü, U., van Gerven, M., & Schoffelen, J.-M. (2022).A 10-hour within-participant magnetoencephalography narrative dataset to test models of naturalistic language comprehension. *Radboud University*. [https://doi.org/10.34973/5rpw-rn92](https://doi.org/https://doi.org/10.34973/5rpw-rn92)

d'Ascoli, S., Bel, C., Rapin, J., Banville, H., Benchetrit, Y., Pallier, C., & King, J.-R. (2025). Towards decoding individual words from non-invasive brain recordings. *Nature Communications, 16*. <https://doi.org/10.1038/s41467-025-65499-0>

Duraisamy, S., Rekrut, M., & Leiva, L. A. (2025). Functional Connectivity and Hilbert-Based Features for Covert Speech EEG Variability Analysis and Classification. *Interspeech 2025*. <https://doi.org/10.21437/Interspeech.2025-1986>

Gijbels, L., Lalonde, K., Shen, Y., Wallace, T. M., & Lee, K. A. (2025). Synchrony perception of audiovisual speech is a reliable, yet individual construct. *Scientific Reports*, *15*(1). [https://doi.org/10.1038/s41598-025-00243-8](https://doi.org/https://doi.org/10.1038/s41598-025-00243-8)

Graves, A., Fernández, S., Gomez, F., & Schmidhuber, J. (2006). Connectionist temporal classification: Labelling unsegmented sequence data with recurrent neural networks. *Proceedings of the 23rd International Conference on Machine Learning 2006*. <https://doi.org/10.1145/1143844.1143891>

Gwilliams, L., Flick, G., Marantz, A., Pylkkänen, L., Poeppel, D., & King, J.-R. (2023). Introducing MEG-MASC a high-quality magneto-encephalography dataset for evaluating natural speech processing. *Scientific data*, *10*(1), 862. <https://doi.org/10.1038/s41597-023-02752-5>

Kingma, D. P., & Ba, J. (2015). Adam: A Method for Stochastic Optimization. *International Conference for Learning Representations 2015*. <https://doi.org/10.48550/arXiv.1412.6980>

Littlejohn, K. T., Cho, C. J., Liu, J. R., Silva, A. B., Yu, B., Anderson, V. R., … Anumanchipalli, G. K. (2025). A streaming brain-to-voice neuroprosthesis to restore naturalistic communication. *Nature Neuroscience*. <https://doi.org/10.1038/s41593-025-01905-6>

Mohri, M., Pereira, F., & Riley, M. (2002). Weighted finite-state transducers in speech recognition. *Computer Speech & Language*, *16*(1), 69-88. [https://doi.org/10.1006/csla.2001.0184](https://doi.org/https://doi.org/10.1006/csla.2001.0184)

Nastase, S. A., Liu, Y.-F., Hillman, H., Zadbood, A., Hasenfratz, L., Keshavarzian, N., … Hasson, U. (2021). The "Narratives" fMRI dataset for evaluating models of naturalistic language comprehension. *Scientific data*, *8*(1), 250. <https://doi.org/10.1038/s41597-021-01033-3>

Radford, A., Wu, J., Child, R., Luan, D., Amodei, D., & Sutskever, I. (2019). Language Models are Unsupervised Multitask Learners.

Silva, A. B., Littlejohn, K. T., Liu, J. R., Moses, D. A., & Chang, E. F. (2024). The speech neuroprosthesis. *Nature Reviews. Neuroscience*, *25*(7), 473-492. <https://doi.org/10.1038/s41583-024-00819-9>

Stolcke, A. (2002). SRILM - an extensible language modeling toolkit. *7th International Conference on Spoken Language Processing.* <https://doi.org/10.21437/ICSLP.2002-303>

Willett, F. R., Kunz, E. M., Fan, C., Avansino, D. T., Wilson, G. H., Choi, E. Y., … Henderson, J. M. (2023). A high-performance speech neuroprosthesis. *Nature*, *620*(7976), 1031-1036. <https://doi.org/10.1038/s41586-023-06377-x>
